# Supplementary material for: Supramolecular nanoarchitectonics of propionylated polyrotaxanes with bulky nitrobenzyl stoppers for light-triggered drug release
Source: Royal Society of Chemistry journal article supplement (doi:10.1039/d4ra00213j), 2024-01-01
Supplement: d4ra00213j1.pdf [file d4ra00213j1.pdf]

Supplementary information

**Supramolecular nanoarchitectonics of propionylated polyrotaxanes with bulky nitrobenzyl stoppers for light-triggered drug release**

Shunyao Zhang, Atsushi Tamura\*, Nobuhiko Yui

Department of Organic Biomaterials, Institute of Biomaterials and Bioengineering, Tokyo Medical and Dental University (TMDU), 2-3-10 Kanda-Surugadai, Chiyoda, Tokyo 101-0062, Japan.

\* Corresponding author (E-mail: [tamura.org@tmd.ac.jp](mailto:tamura.org@tmd.ac.jp))

## S1. Instrumentations

$^1\text{H}$  and  $^{13}\text{C}$  nuclear magnetic resonance (NMR) spectra were recorded on a Bruker Avance III 400 MHz spectrometer (Bruker BioSpin, Rheinstetten, Germany) at 25.0 °C. Electrospray ionization mass spectrometry (ESI-MS) was performed on a microTOF focus II (Bruker Daltonics, Bremen, Germany). Fourier-transform infrared (FT-IR) spectra were recorded using a Spectrum 100 FT-IR spectrometer (PerkinElmer, Waltham, MA, USA). The powder sample was mixed with KBr, ground in an agate grinding mill, and pressed to obtain transparent KBr pellets.

## S2. Synthesis of 4,5-dimethoxy-2-nitrobenzyl 4-nitrophenyl carbonate

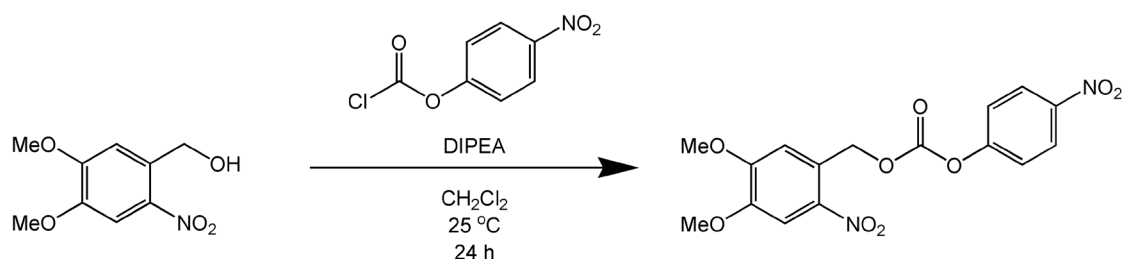

4,5-Dimethoxy-2-nitrobenzyl alcohol (1.95 g, 9.15 mmol; Tokyo Chemical Industry, Tokyo, Japan) was dissolved in  $\text{CH}_2\text{Cl}_2$  (100 mL; Kanto Chemical, Tokyo, Japan), and *N,N*-diisopropylethylamine (DIPEA; 3.11 mL, 18.3 mmol; Tokyo Chemical Industry) and 4-nitrophenyl chloroformate (3.69 g, 18.3 mmol; Tokyo Chemical Industry) were successively added to the solution. The solution was stirred for 24 h at 25 °C. After the reaction, the solution was washed successively with 10 mM HCl (100 mL  $\times$  5), distilled water (100 mL  $\times$  3), and brine (100 mL  $\times$  1). The organic layer was collected and dried over  $\text{MgSO}_4$ . The product was purified via column chromatography using toluene/acetone (20:1). The collected product was recrystallized from toluene. The powder was collected by filtration and dried in vacuo to yield 4,5-dimethoxy-2-nitrobenzyl 4-nitrophenyl carbonate (1.82 g, 52.6% yield).  $^1\text{H}$  NMR (400 MHz,  $\text{CDCl}_3$ ):  $\delta$  (ppm) = 3.96 (s, 3H, OMe), 4.00 (s, 3H, OMe), 5.69 (s, 2H,  $-\text{CH}_2-$ ), 7.08 (s, 1H, 3-position in 4,5-dimethoxy-2-nitrobenzyl), 7.39 (d, 2H, 2- and 6-positions in 4-nitrophenyl), 7.75 (s, 1H, 6-position in 4,5-dimethoxy-2-nitrobenzyl), 8.28 (d, 2H, 3- and 5-positions in 4-nitrophenyl).  $^{13}\text{C}$  NMR (101 MHz,  $\text{CDCl}_3$ ):  $\delta$  (ppm) = 56.5, 56.6, 67.7, 108.5, 110.7, 121.7, 125.1, 125.4, 140.1, 145.6, 148.9, 152.1, 153.7, 155.4. ESI-MS:  $m/z$  calcd. for  $\text{C}_{16}\text{H}_{14}\text{N}_2\text{NaO}_9$   $[\text{M}+\text{Na}]^+$  401.0592, found 401.1582.

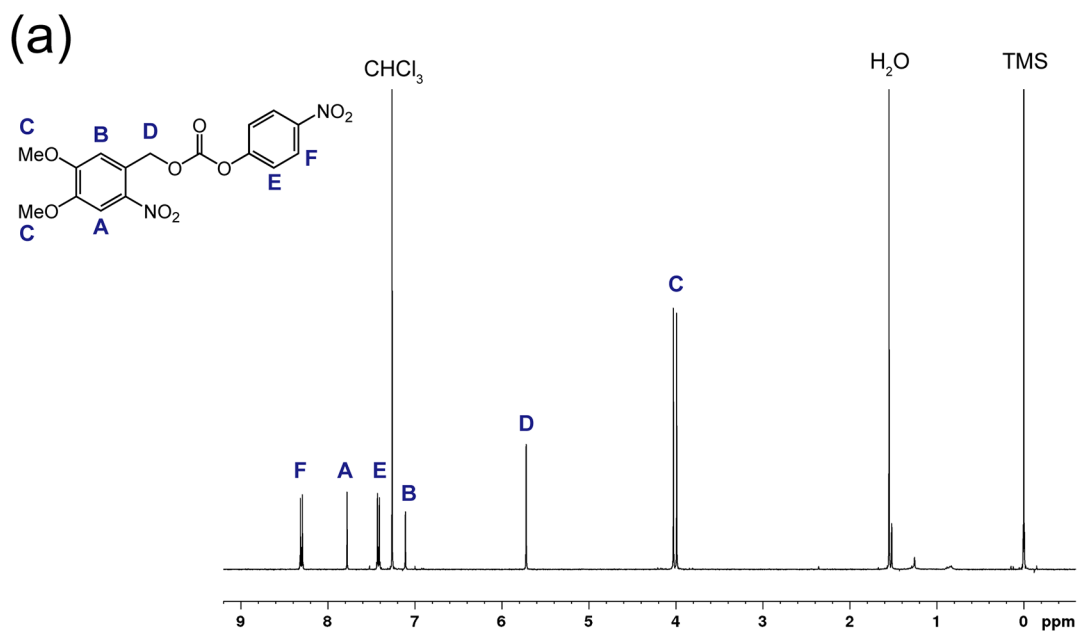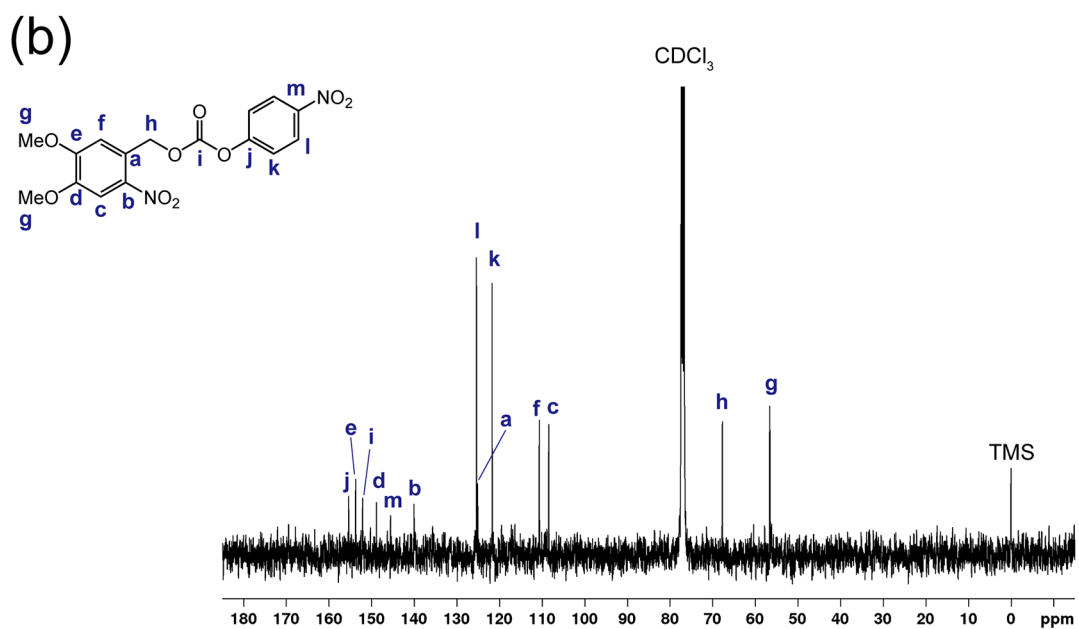

**Figure S1.** (a)  $^1\text{H}$  and (b)  $^{13}\text{C}$  NMR spectra of 4,5-dimethoxy-2-nitrobenzyl 4-nitrophenyl carbonate in CDCl<sub>3</sub> at 25 °C.

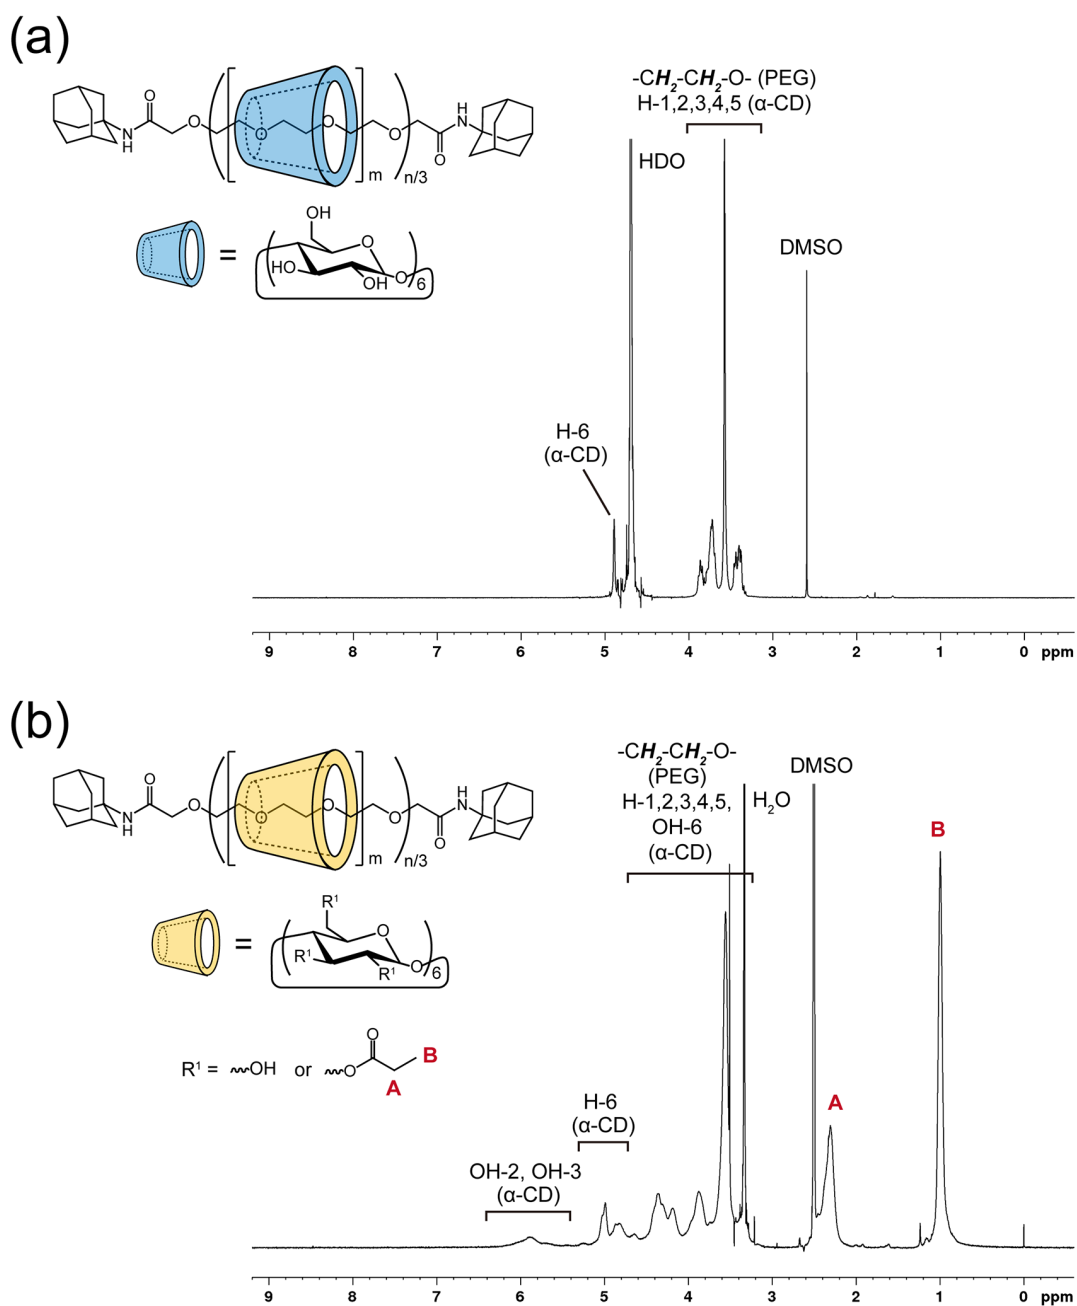

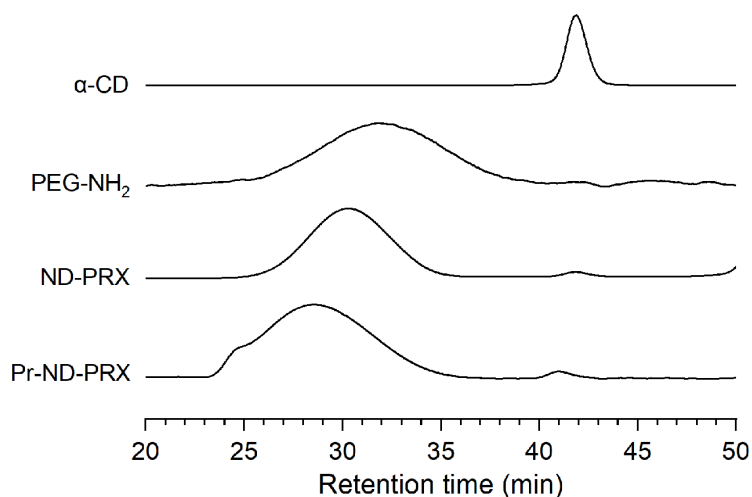

**Figure S3.** SEC charts of  $\alpha$ -CD, PEG-NH<sub>2</sub>, ND-PRX, and Pr-ND-PRX eluted with DMSO containing 10 mM LiBr at 60 °C. The peaks were detected with RI.

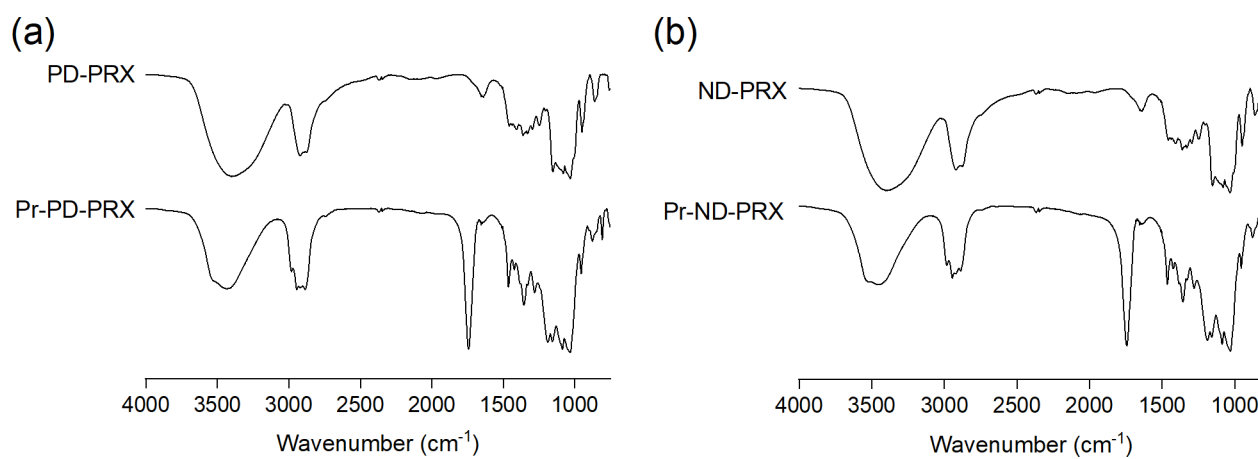

**Figure S4.** (a) FT-IR spectra of PD-PRX and Pr-PD-PRX. (b) FT-IR spectra of ND-PRX and Pr-ND-PRX.
